# Supplementary material for: Generation of iPSC-derived human forebrain organoids assembling bilateral eye primordia
Source: Springer Nature journal article supplement (doi:10.1038/s41596-023-00814-x), 2023-05-17
Supplement: MOESM2 [file 41596_2023_814_MOESM2_ESM17.xlsx]

## Sheet: Gene list 
	gene name	ENSEMBL	Source
	high expression in ipsilateral RGCs:
	GJA1	ENSG00000152661	DOI: https://doi.org/10.1523/ENEURO.0169-16.2016
	SPARC	ENSG00000113140	DOI: https://doi.org/10.1523/ENEURO.0169-16.2016
	LHX2	ENSG00000106689	DOI: https://doi.org/10.1523/ENEURO.0169-16.2016
	SLC6A4	ENSG00000108576	DOI: https://doi.org/10.1523/ENEURO.0169-16.2016
	ZFP36	ENSG00000128016	DOI: https://doi.org/10.1523/ENEURO.0169-16.2016
	ZIC1	ENSG00000152977	DOI: https://doi.org/10.1523/ENEURO.0169-16.2016
	ZIC2	ENSG00000043355	DOI: https://doi.org/10.1523/ENEURO.0169-16.2016
	LAPTM5	ENSG00000162511	DOI: https://doi.org/10.1523/ENEURO.0169-16.2016
	AIF1	ENSG00000204472	DOI: https://doi.org/10.1523/ENEURO.0169-16.2016
	HEXB	ENSG00000049860	DOI: https://doi.org/10.1523/ENEURO.0169-16.2016
	high expression in contralateral RGCs:
	SEMA3E	ENSG00000170381	DOI: https://doi.org/10.1523/ENEURO.0169-16.2016
	NAPB	ENSG00000125814	DOI: https://doi.org/10.1523/ENEURO.0169-16.2016
	BMPER	ENSG00000164619	DOI: https://doi.org/10.1523/ENEURO.0169-16.2016
	RGS4	ENSG00000117152	DOI: https://doi.org/10.1523/ENEURO.0169-16.2016
	RUSC1	ENSG00000160753	DOI: https://doi.org/10.1523/ENEURO.0169-16.2016
	Optic chiasm:
	PAX2	ENSG00000075891	GO term list for optic chiasm
	PLP	ENSG00000123560	PloS one 6.11 (2011): e27925
	MBP	ENSG00000197971	PloS one 6.11 (2011): e27925
	Ephrin-B2	ENSG00000125266	Neuron 97.2 (2018): 256-258.
	FOXD1	ENSG00000251493	our CSC paper
	ZIC2	ENSG00000043355	our CSC paper
	EPHB1	ENSG00000154928	our CSC paper
	ISL1	ENSG00000016082	our CSC paper
	SLIT2	ENSG00000145147	our CSC paper
	Optic tract:
	FGF8	ENSG00000107831	https://doi.org/10.1016/j.neuron.2004.11.029
	FGFR3	ENSG00000068078	doi: 10.1523/ENEURO.0086-19.2019
	SLIT1	ENSG00000187122	https://doi.org/10.1016/j.neuron.2004.11.029
	SLIT2	ENSG00000145147	https://doi.org/10.1016/j.neuron.2004.11.029
	SEMA3A	ENSG00000075213	doi: 10.1523/ENEURO.0086-19.2019
	EXT2	ENSG00000151348	https://doi.org/10.1016/j.neuron.2004.11.029
	EXTL3	ENSG00000012232	https://doi.org/10.1016/j.neuron.2004.11.029
	Optic nerve morphogenesis and structural organisation
	PAX2	ENSG00000075891	GO term list for optic nerve
	EPHB2	ENSG00000133216	GO term list for optic nerve
	EPHB1	ENSG00000154928	GO term list for optic nerve
	GLI3	ENSG00000106571	GO term list for optic nerve
	KCNA2	ENSG00000177301	GO term list for optic nerve
	RPL17	ENSG00000265681	Geneset "Nucleus of optic tract" Allen Brain Mouse Atlas
	SLITRK3	ENSG00000121871	Geneset "Nucleus of optic tract" Allen Brain Mouse Atlas
	CXXC1	ENSG00000154832	Geneset "Nucleus of optic tract" Allen Brain Mouse Atlas
	SREK1	ENSG00000153914	Geneset "Nucleus of optic tract" Allen Brain Mouse Atlas
	LGN
	GAD2	ENSG00000136750	https://maayanlab.cloud/Harmonizome/gene_set/lateral+geniculate+nucleus/TISSUES+Text-mining+Tissue+Protein+Expression+Evidence+Scores
	PVALB	ENSG00000100362	https://maayanlab.cloud/Harmonizome/gene_set/lateral+geniculate+nucleus/TISSUES+Text-mining+Tissue+Protein+Expression+Evidence+Scores
	GABBR1	ENSG00000204681	https://maayanlab.cloud/Harmonizome/gene_set/lateral+geniculate+nucleus/TISSUES+Text-mining+Tissue+Protein+Expression+Evidence+Scores
	SPG7	ENSG00000197912	https://maayanlab.cloud/Harmonizome/gene_set/lateral+geniculate+nucleus/TISSUES+Text-mining+Tissue+Protein+Expression+Evidence+Scores
	CALB1	ENSG00000104327	https://maayanlab.cloud/Harmonizome/gene_set/lateral+geniculate+nucleus/TISSUES+Text-mining+Tissue+Protein+Expression+Evidence+Scores
	PCP4	ENSG00000183036	https://maayanlab.cloud/Harmonizome/gene_set/lateral+geniculate+nucleus/TISSUES+Text-mining+Tissue+Protein+Expression+Evidence+Scores
	LHX9	ENSG00000143355	our CSC paper
	TCF7L2	ENSG00000148737	our CSC paper
	PCP4L1	ENSG00000248485	our CSC paper
	Visual cortex
	B4GALT2	ENSG00000117411	http://amigo.geneontology.org/amigo/search/bioentity?q=visual cortex
	BFSP1	ENSG00000125864	http://amigo.geneontology.org/amigo/search/bioentity?q=visual cortex
	HMCN1	ENSG00000143341	http://amigo.geneontology.org/amigo/search/bioentity?q=visual cortex
	NAGLU	ENSG00000108784	http://amigo.geneontology.org/amigo/search/bioentity?q=visual cortex
	CABP1	ENSG00000157782	http://amigo.geneontology.org/amigo/search/bioentity?q=visual cortex
	NR2E1	ENSG00000157782	http://amigo.geneontology.org/amigo/search/bioentity?q=visual cortex
	MYO7A	ENSG00000137474	http://amigo.geneontology.org/amigo/search/bioentity?q=visual cortex
	SHROOM2	ENSG00000146950	http://amigo.geneontology.org/amigo/search/bioentity?q=visual cortex
	TMOD1	ENSG00000136842	http://amigo.geneontology.org/amigo/search/bioentity?q=visual cortex
	CLIC5	ENSG00000112782	http://amigo.geneontology.org/amigo/search/bioentity?q=visual cortex
	AGTPBP1	ENSG00000135049	http://amigo.geneontology.org/amigo/search/bioentity?q=visual cortex
	CDK5	ENSG00000164885	http://amigo.geneontology.org/amigo/search/bioentity?q=visual cortex
	WDPCP	ENSG00000143951	http://amigo.geneontology.org/amigo/search/bioentity?q=visual cortex
	SLC4A10	ENSG00000144290	http://amigo.geneontology.org/amigo/search/bioentity?q=visual cortex
	DLL1	ENSG00000198719	http://amigo.geneontology.org/amigo/search/bioentity?q=visual cortex
